# Supplementary material
Source: publisher figshare collection journal article supplement (https://gsapubs.figshare.com/ndownloader/files/22399056)

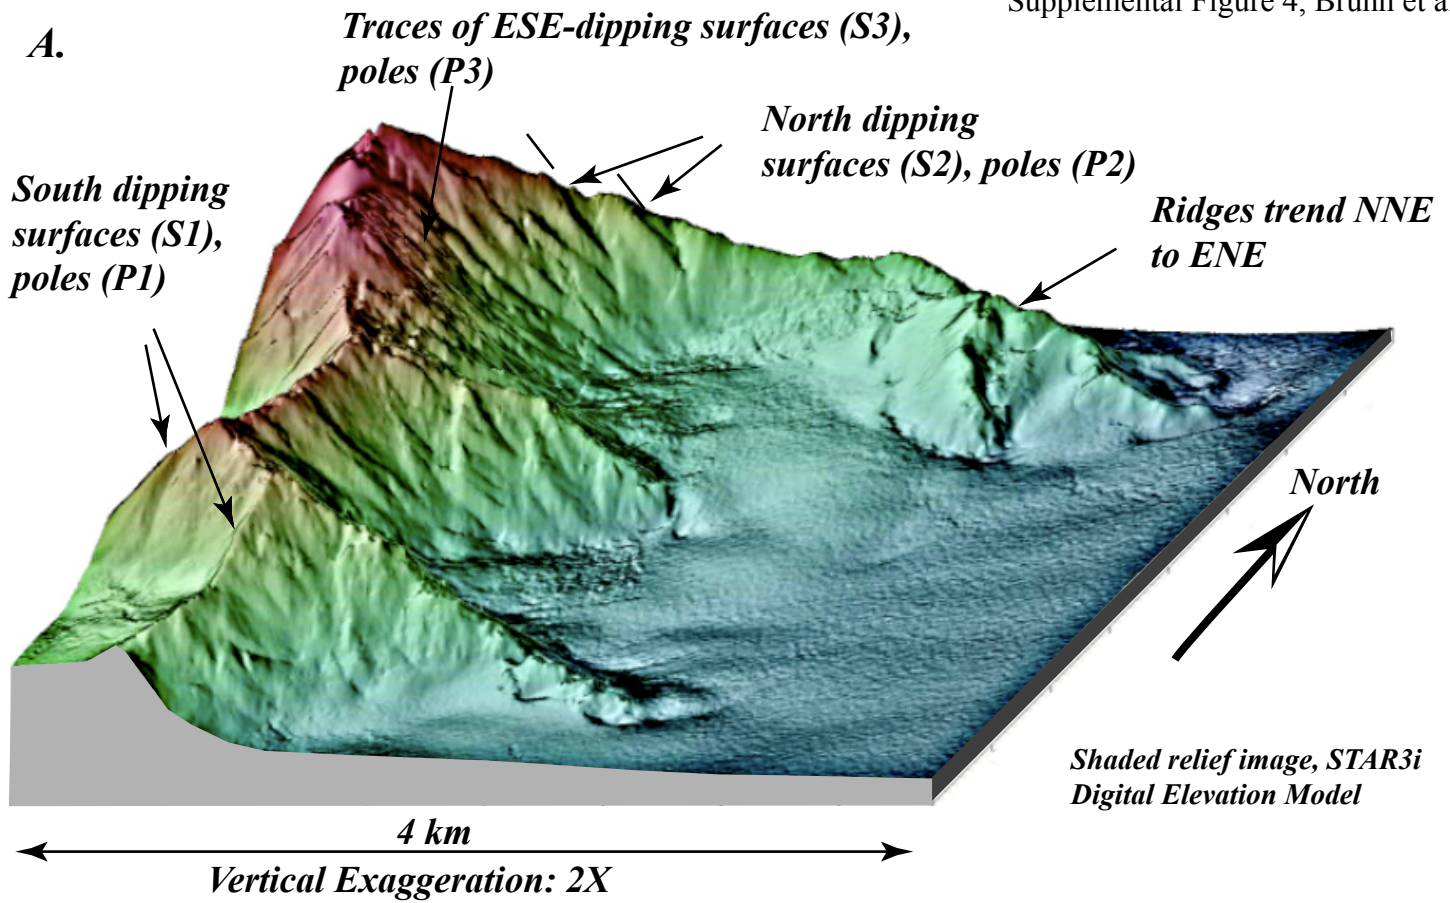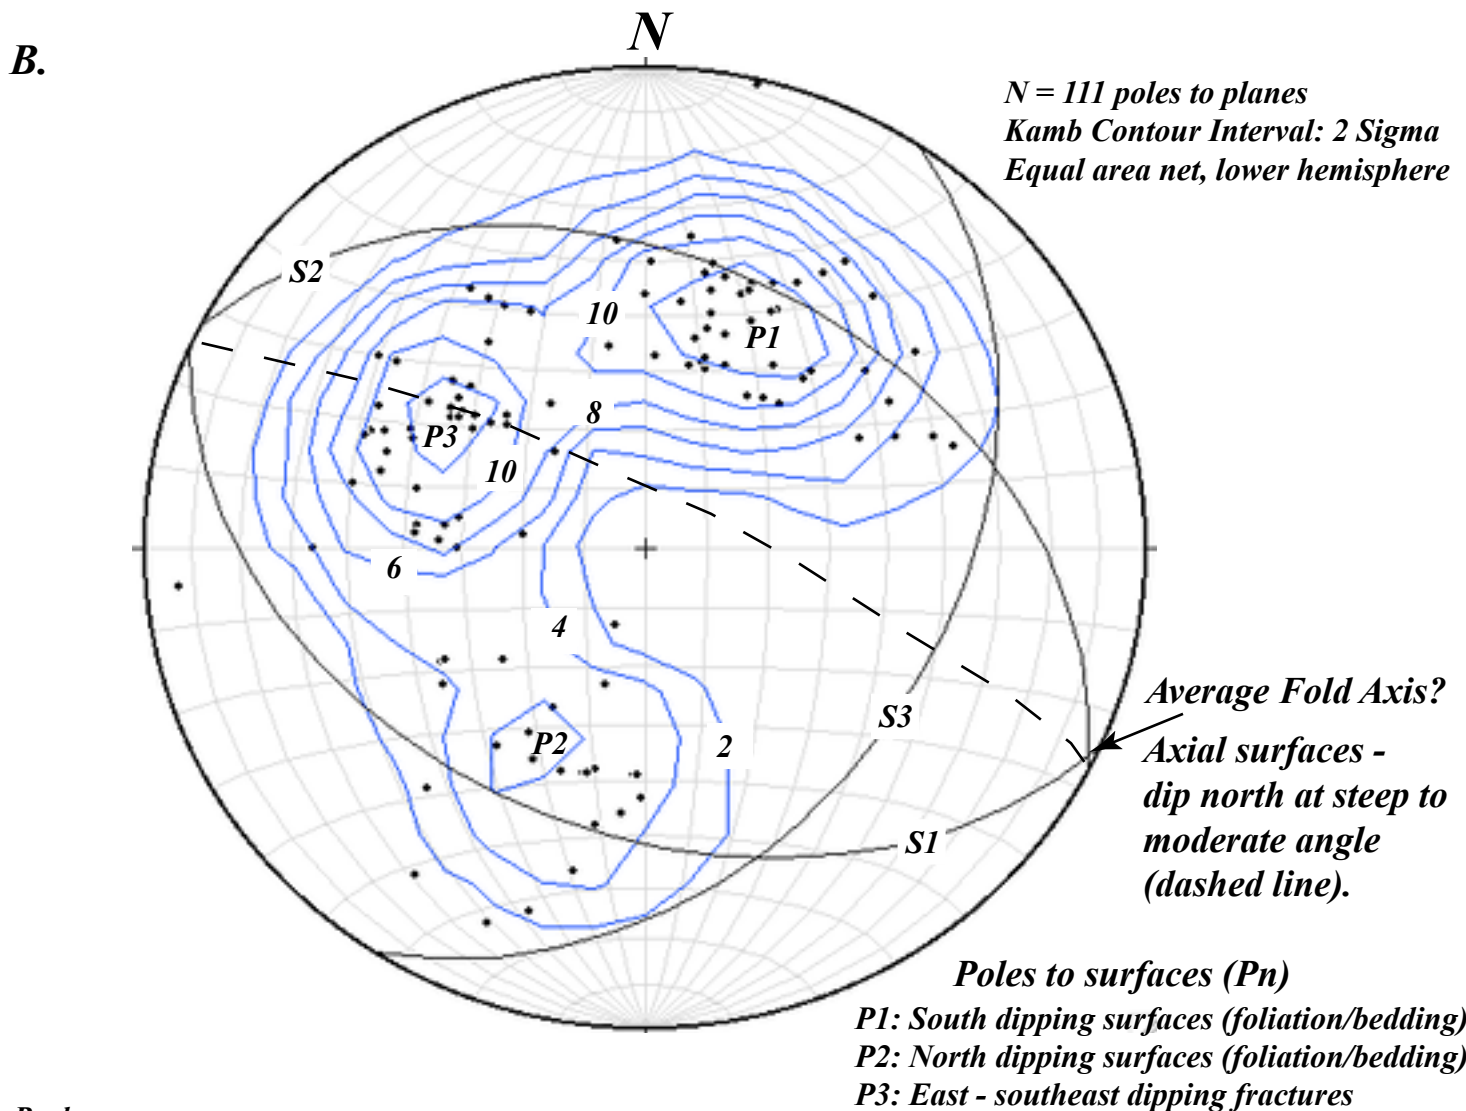

Supplement: Supplementary file 1 [file 22399056]
